# Supplementary material for: Selection, characterization, and thermal stabilization of llama single domain antibodies towards Ebola virus glycoprotein
Source: PubMed Central journal article supplement (PMC5726015; doi:10.1186/s12934-017-0837-z), 2017-12-12
Supplement: 12934_2017_837_MOESM1_ESM.pdf [file 12934_2017_837_MOESM1_ESM.pdf]

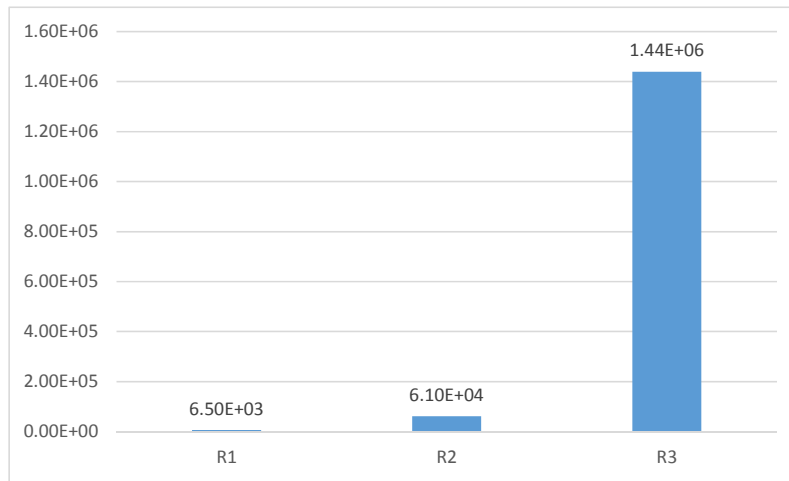

Fig S1. Biopanning against EBOV GP. The titer of eluted phage was determined at end of each round of biopanning. Each panning round used the same number of inputted phage ( $\sim 5 \times 10^{11}$ ).

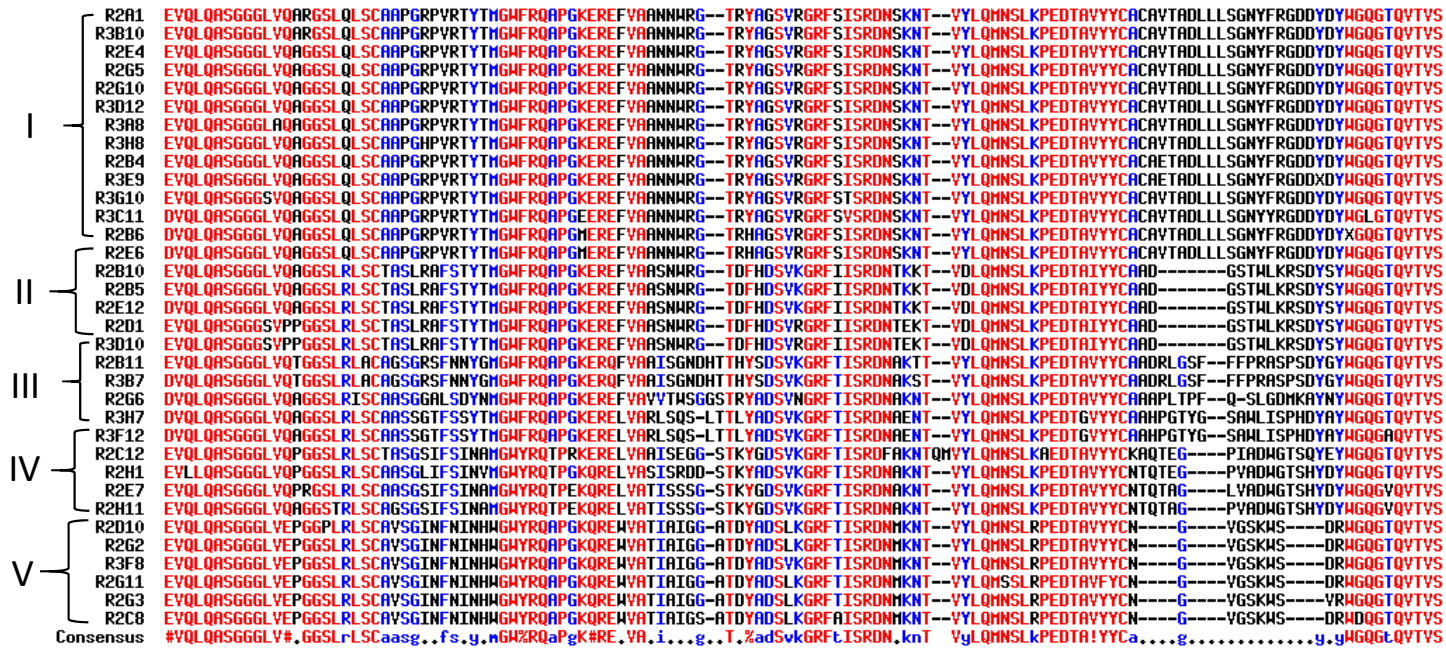

FigS2. Thirty four potential GP sAb sequences selected from the second and third rounds of panning against EBOV GP. R2 signifies sequences selected in round 2 while R3 signifies sequences were isolated from round 3.

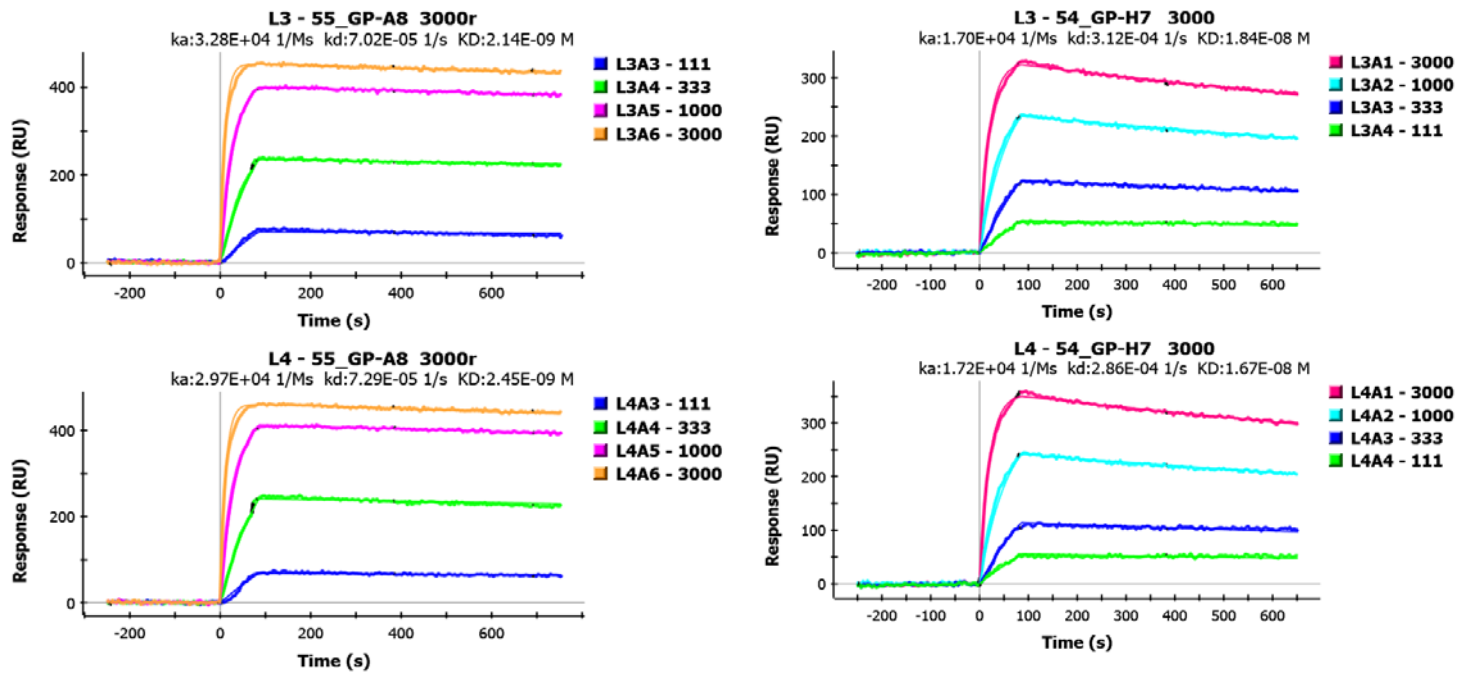

Fig. S3. Measurements of KD using SPR biosensor. The surface was coated with EBOV GP first and a serial dilution of purified sdAbs (3000, 1000, 333, and 111 nM) were then injected. Duplicate data is shown above for EBOV-GP-A8 on the left and EBOV-GP-H7 on the right.

| IMGT number | EBOV-GP-H7 | EBOV-GP-G6 | EBOV-GP-A8 |
|-------------|------------|------------|------------|
| 1           | D          | D          | E          |
| 2           | V          | V          | V          |
| 3           | Q          | Q          | Q          |
| 4           | L          | L          | L          |
| 5           | Q          | Q          | Q          |
| 6           | A          | A          | A          |
| 7           | S          | S          | S          |
| 8           | G          | G          | G          |
| 9           | G          | G          | G          |
| 10          | -          | -          | -          |
| 11          | G          | G          | G          |
| 12          | L          | L          | L          |
| 13          | V          | V          | A          |
| 14          | Q          | Q          | Q          |
| 15          | A          | A          | A          |
| 16          | G          | G          | G          |
| 17          | G          | G          | G          |
| 18          | S          | S          | S          |
| 19          | L          | L          | G          |
| 20          | R          | R          | Q          |
| 21          | L          | I          | L          |
| 22          | S          | S          | S          |
| 23          | C          | C          | C          |
| 24          | A          | A          | A          |
| 25          | A          | A          | A          |
| 26          | S          | S          | P          |
| 27          | S          | G          | G          |
| 28          | G          | G          | R          |
| 29          | T          | A          | P          |
| 30          | F          | L          | V          |
| 31          | -          | -          | -          |
| 32          | -          | -          | -          |
| 33          | -          | -          | -          |
| 34          | -          | -          | -          |
| 35          | S          | S          | R          |
| 36          | S          | D          | T          |
| 37          | Y          | Y          | Y          |
| 38          | T          | N          | T          |
| 39          | M          | M          | M          |
| 40          | G          | G          | G          |
| 41          | W          | W          | W          |
| 42          | F          | F          | F          |
| 43          | R          | R          | R          |
| 44          | Q          | Q          | Q          |
| 45          | A          | A          | A          |
| 46          | P          | P          | P          |
| 47          | G          | G          | G          |
| 48          | K          | K          | K          |
| 49          | E          | E          | E          |
| 50          | R          | R          | R          |
| 51          | E          | E          | E          |
| 52          | L          | F          | F          |
| 53          | V          | V          | V          |

|     |   |   |   |
|-----|---|---|---|
| 54  | A | A | A |
| 55  | R | V | A |
| 56  | L | V | N |
| 57  | S | T | N |
| 58  | Q | W | W |
| 59  | S | S | - |
| 60  | - | - | - |
| 61  | - | - | - |
| 62  | - | G | - |
| 63  | L | G | R |
| 64  | T | S | G |
| 65  | T | T | T |
| 66  | L | R | R |
| 67  | Y | Y | Y |
| 68  | A | A | A |
| 69  | D | D | G |
| 70  | S | S | S |
| 71  | V | V | V |
| 72  | K | N | R |
| 73  | - | - | - |
| 74  | G | G | G |
| 75  | R | R | R |
| 76  | F | F | F |
| 77  | T | T | S |
| 78  | I | I | I |
| 79  | S | S | S |
| 80  | R | R | R |
| 81  | D | D | D |
| 82  | N | N | N |
| 83  | A | A | S |
| 84  | E | K | K |
| 85  | N | N | N |
| 86  | T | T | T |
| 87  | V | V | V |
| 88  | Y | Y | Y |
| 89  | L | L | L |
| 90  | Q | Q | Q |
| 91  | M | M | M |
| 92  | N | N | N |
| 93  | S | S | S |
| 94  | L | L | L |
| 95  | K | K | K |
| 96  | P | P | P |
| 97  | E | E | E |
| 98  | D | D | D |
| 99  | T | T | T |
| 100 | G | A | A |
| 101 | V | V | V |
| 102 | Y | Y | Y |
| 103 | Y | Y | Y |
| 104 | C | C | C |
| 105 | A | A | A |
| 106 | A | A | C |
| 107 | H | A | A |

|      |   |   |   |
|------|---|---|---|
| 108  | P | P | V |
| 109  | G | L | T |
| 110  | T | T | A |
| 111  | Y | P | D |
| 111A | G | F | L |
| 111B | S | Q | L |
| 111C | A | S | L |
| 112D | W | - | S |
| 112E | - | - | G |
| 112D |   |   | N |
| 112C | L | L | Y |
| 112B | I | G | F |
| 112A | S | D | R |
| 112  | P | M | G |
| 113  | H | K | D |
| 114  | D | A | D |
| 115  | Y | Y | Y |
| 116  | A | N | D |
| 117  | Y | Y | Y |
| 118  | W | W | W |
| 119  | G | G | G |
| 120  | Q | Q | Q |
| 121  | G | G | G |
| 122  | T | T | T |
| 123  | Q | Q | Q |
| 124  | V | V | V |
| 125  | T | T | T |
| 126  | V | V | V |
| 127  | S | S | S |
| 128  | S | S | S |

Fig. S4. Table of IMGT number and corresponding amino acid at each position for clones EBOV-GP-A8, EBOV-GP-H7 and EBOV-GP-G6. CDR regions are highlighted in red for CDR1, blue for CDR2, and green for CDR3.

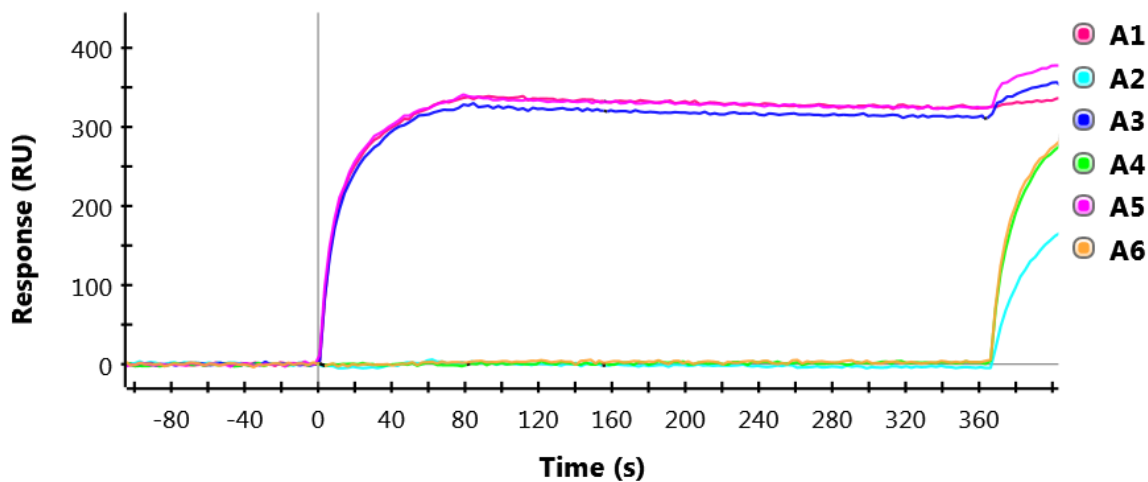

| SdAb        | % Inhib. vs A8 |
|-------------|----------------|
| EBOV-GP-H7  | 68             |
| EBOV-GP-D1  | 82             |
| EBOV-GP-B5  | 80             |
| EBOV-GP-B11 | 87             |
| EBOV-GP-G6  | 97             |
| EBOV-GP-E7  | 0              |
| EBOV-GP-C12 | 0              |

Fig S5. Binding competition determination. First an SPR chip was coated with EBOV GP. Next EBOV-GP-A8 was flowed over three lanes (lanes 1, 3, and 5); buffer only was flowed over lanes 2, 4, and 6. Finally various anti-EBOV GP sdAbs were flowed over pairs of lanes: one lane blocked by pre-binding of EBOV-GP-A8 and one unblocked (buffer only in the previous step). To determine inhibition we compared sdAb binding to the two surfaces. The graph above shows data for EBOV-GP-H7 (red and light blue), EBOV-GP-D1 (dark blue and green), and EBOV-GP-B5 (pink and orange). The adjoining table shows the calculated percent inhibition versus A8 for the 3 sdAbs shown on the graph above and sdAbs determined by performing additional tests.

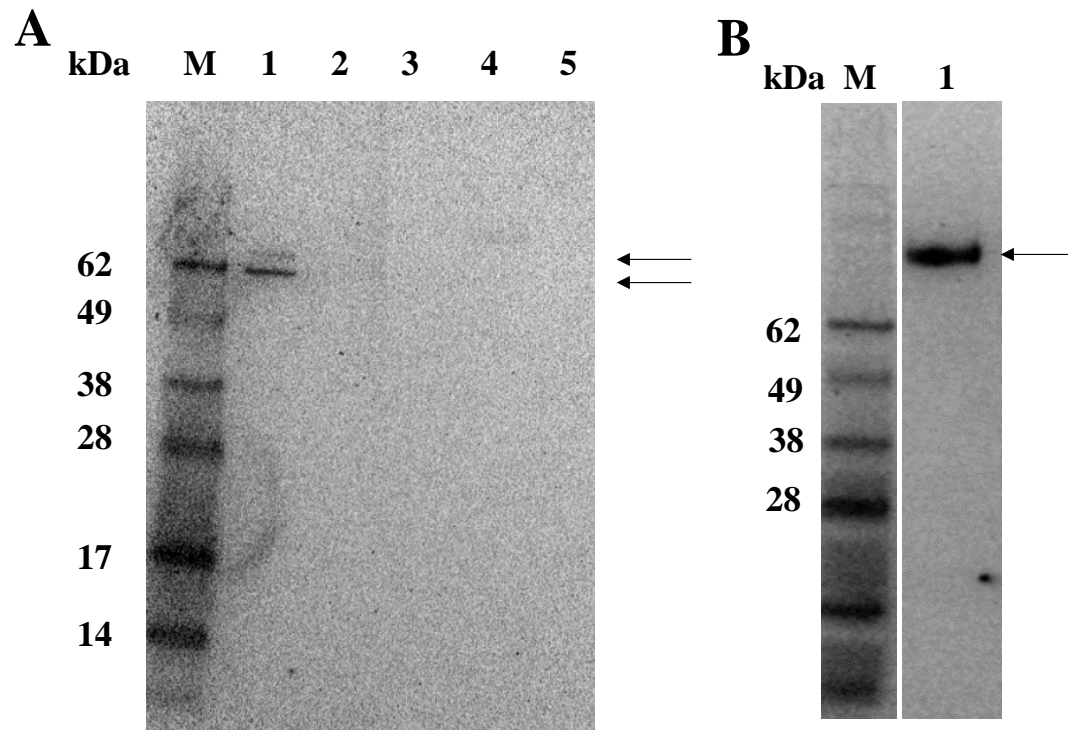

Fig. S6. Western blotting analysis of GP and VLP binding specificity and cross reactivity for G6-neg+-GS3K. A. Lane 1 represents EBOV VLPs, where as GP indicated by arrows. Lanes 2 and 3 represent the SUDV VLPs and MARV VLP respectively. Lanes 4 and 5 represent EBOV GP and MARV GP, respectively. Lane M is the size marker. B. The binding of A8-fneg+-GS3K to EBOV GP. Lane 1 represents EBOV GP as indicated by the arrow.
